# Supplementary material for: Integration of molecular profiles in a longitudinal wellness profiling cohort
Source: Nat Commun. 2020 Sep 8;11:4487. doi: 10.1038/s41467-020-18148-7 (PMC7479148; doi:10.1038/s41467-020-18148-7)
Supplement: Supplementary file 7 — Description of Additional Supplementary Files [file 41467_2020_18148_MOESM7_ESM.pdf]

**Title:** Supplementary Movie 1.

**Description:** Animation of the longitudinal distribution for a selection of clinical parameters.

**Title:** Supplementary Movie 2.

**Description:** Animation of the two dimensional UMAP results.

**Title:** Supplementary Dataset 1.

**Description:** Description and summary of the longitudinal clinical data for the 94 subjects that completed the study.

**Title:** Supplementary Dataset 2.

**Description:** Complete list of analyzed variables per dataset.

**Title:** Supplementary Dataset 3.

**Description:** Complete list of significant mixed effect modelling result.
